# Supplementary material
Source: publisher figshare collection journal article supplement (https://gsajournals.figshare.com/ndownloader/files/25179329)
Supplement: Supplementary file 1 [file 25179329]

## Sheet: Overexpression_SupplementalFile
Gene	Average No Drug AUC	No Drug AUC Standard Deviation	Average AZC AUC	AZC AUC Standard Deviation	Average Ratio (AZC AUC/No Drug AUC)	Ratio Standard Deviation	Replicates	Corrected P-Value	Fold Change in Ratio (relative to Control strain)
MCD4	332.525	135.419	256.983	124.423	0.758477	0.0534452	3	0.00033131	4.14833
MAK3	778.683	21.2988	483.155	100.471	0.621474	0.137036	3	0.0269894	3.39902
PUP2	803.805	2.2189	493.205	33.8547	0.613665	0.0436845	3	0.000165593	3.35631
RVS167	858.447	47.7136	486.375	18.7737	0.56783	0.0405827	3	0.000124199	3.10563
HSF1	303.01	69.2083	158.778	24.7457	0.539619	0.123473	3	0.0323393	2.95133
LAS17	648.111	32.8145	329.219	134.259	0.500712	0.185984	5	0.0174564	2.73854
PRE6	803.325	49.7694	400.978	13.1843	0.500345	0.0334964	3	3.11766e-05	2.73653
HRP1	787	80.6841	389.853	56.6074	0.495711	0.060117	3	0.00418	2.71119
VPS27	820.638	67.8761	395.717	20.4382	0.485263	0.0580461	3	0.00387745	2.65404
HAP5	741.95	52.7164	315.68	43.7047	0.424193	0.0322734	3	8.43275e-05	2.32003
DFR1	840.755	97.5477	353.955	51.651	0.420188	0.0235408	3	7.2425e-07	2.29813
STE5	468.623	42.5716	195.208	8.76423	0.418126	0.0304886	3	4.75923e-05	2.28685
UBI4	799.062	92.0237	340.363	167.5	0.414321	0.152206	3	0.114456	2.26604
SWD2	891.285	99.9895	368.913	64.4144	0.412295	0.028833	3	2.60687e-05	2.25496
SYG1	712.021	99.398	297.018	101.519	0.409208	0.0961138	5	0.00397062	2.23808
POP3	870.753	62.3806	355.4	40.6265	0.407465	0.022743	3	6.337e-07	2.22855
TOA1	845.495	104.951	346.51	82.1817	0.406484	0.0499182	3	0.00439136	2.22318
CAB5	848.518	9.8924	337.402	75.7147	0.398369	0.0944526	3	0.0484199	2.17879
POC4	771.837	83.507	295.07	84.4523	0.393577	0.160541	3	0.147121	2.15258
RPT6	670.058	38.7698	258.38	19.4772	0.387061	0.0452393	3	0.00336094	2.11695
KRE28	827.673	54.8663	319.358	8.24051	0.386567	0.0165369	3	5.44029e-09	2.11425
ASE1	703.765	102.385	265.608	26.1047	0.382189	0.0639273	3	0.0183581	2.0903
NPR2	793.967	23.6437	293.942	107.05	0.367807	0.121839	3	0.112552	2.01164
MOB1	639.232	156.152	227.15	41.7461	0.358996	0.0304781	3	0.000255175	1.96345
NOP8	679.855	70.4863	233.368	10.2051	0.346964	0.053786	3	0.015998	1.89765
YMR315W	818.428	101.033	284.215	59.4693	0.345016	0.0307232	3	0.000440184	1.88699
SAM37	900.362	128.596	295.835	83.1713	0.324505	0.0439114	3	0.0100289	1.77481
YCR006C	809.003	77.912	257.6	90.0428	0.313681	0.077944	3	0.0860765	1.71561
CIN1	775.987	159.026	243.338	81.3707	0.308496	0.0375639	3	0.00667555	1.68725
OPI3	587.622	43.3931	177.2	20.6346	0.302814	0.0432661	3	0.0162522	1.65617
BUD27	793.043	25.8134	234.537	64.351	0.294396	0.0720877	3	0.099474	1.61013
MOG1	838.612	131.759	237.852	121.647	0.274652	0.0965643	3	0.236141	1.50215
RVS161	593.778	215.236	169.795	100.445	0.271917	0.0590536	3	0.100009	1.48719
PBA1	810.375	85.6551	220.18	85.6889	0.266891	0.0749001	3	0.180604	1.45971
URA6	720.062	215.039	215.137	230.114	0.257664	0.207305	3	0.596738	1.40924
DSL1	809.928	107.251	209.162	61.0204	0.254867	0.0388897	3	0.0534353	1.39394
PRE4	658.893	149.589	173.685	100.898	0.2508	0.085777	3	0.301221	1.3717
ARC15	741.565	111.777	183.643	102.769	0.23981	0.101649	3	0.436318	1.31159
NUS1	560.81	140.103	138.71	100.747	0.229207	0.109346	3	0.542699	1.2536
DID2	532.577	31.8264	120.84	25.3362	0.228881	0.0574616	3	0.299287	1.25182
VRP1	387.142	126.55	83.16	14.4197	0.227822	0.0777444	3	0.42613	1.24602
CDC34	572.005	168.462	139.65	100.559	0.227367	0.0971877	3	0.514909	1.24354
HMI1	580.633	27.9203	132.202	27.8239	0.226657	0.0397338	3	0.186943	1.23966
RPN11	567.945	140.39	134.812	81.8804	0.225094	0.0804843	3	0.46442	1.2311
PRE9	570.337	156.932	137.088	94.1051	0.224402	0.0907929	3	0.515981	1.22732
IRC25	789.865	180.906	177.855	90.7385	0.218511	0.0722341	3	0.490352	1.1951
ARC18	576.595	30.4854	116.79	17.1407	0.203802	0.0382752	3	0.480283	1.11465
XRN1	572.383	200.567	119.787	71.2303	0.199826	0.0508013	3	0.642808	1.09291
MAK32	571.908	185.42	117.405	63.765	0.196613	0.0407281	3	0.652299	1.07533
RPE1	657.183	237.396	115.343	11.8307	0.185458	0.0417948	3	0.932185	1.01432
Control	738.237	150.894	137.515	74.7485	0.182839	0.0749616	22	1	1
YJL218W	660.55	280.478	130.07	103.29	0.178948	0.0654291	3	0.930865	0.978721
SLC1	586.237	87.4601	97.745	8.01429	0.168959	0.0267584	3	0.550337	0.924088
BUD31	598.367	81.5235	93.7775	28.8592	0.162506	0.0650755	3	0.655178	0.888792
